# Supplementary material for: Design and mechanistic study of a novel gold nanocluster-based drug delivery system
Source: Royal Society of Chemistry journal article supplement (doi:10.1039/c8nr02189a), 2018-01-01
Supplement: c8nr02189a1.pdf [file c8nr02189a1.pdf]

## Supporting Information:

### Design and Mechanistic Study of a Novel Gold Nanocluster-Based Drug Delivery System

Qinzheng Li,<sup>a</sup> Yiting Pan,<sup>a</sup> Tiankai Chen,<sup>b</sup> Yuanxin Du,<sup>a</sup> Honghua Ge,<sup>c</sup> Buchang Zhang,<sup>c</sup>  
Jianping Xie,<sup>b</sup> Haizhu Yu,<sup>\*a</sup> and Manzhou Zhu<sup>\*a</sup>

<sup>a</sup> Department of Chemistry and Centre for Atomic Engineering of Advanced Materials,  
Institute of Physical Science and Information Technology, Anhui Province Key Laboratory of  
Chemistry for Inorganic/Organic Hybrid Functionalized Materials, Anhui University, Hefei,  
Anhui, 230601, China.

<sup>b</sup> Department of Chemical and Biomolecular Engineering, National University of Singapore, 4  
Engineering Drive 4, Singapore 117585, Singapore.

<sup>c</sup> Institute of Physical Science and Information Technology, Anhui University, Hefei, Anhui,  
230601, China

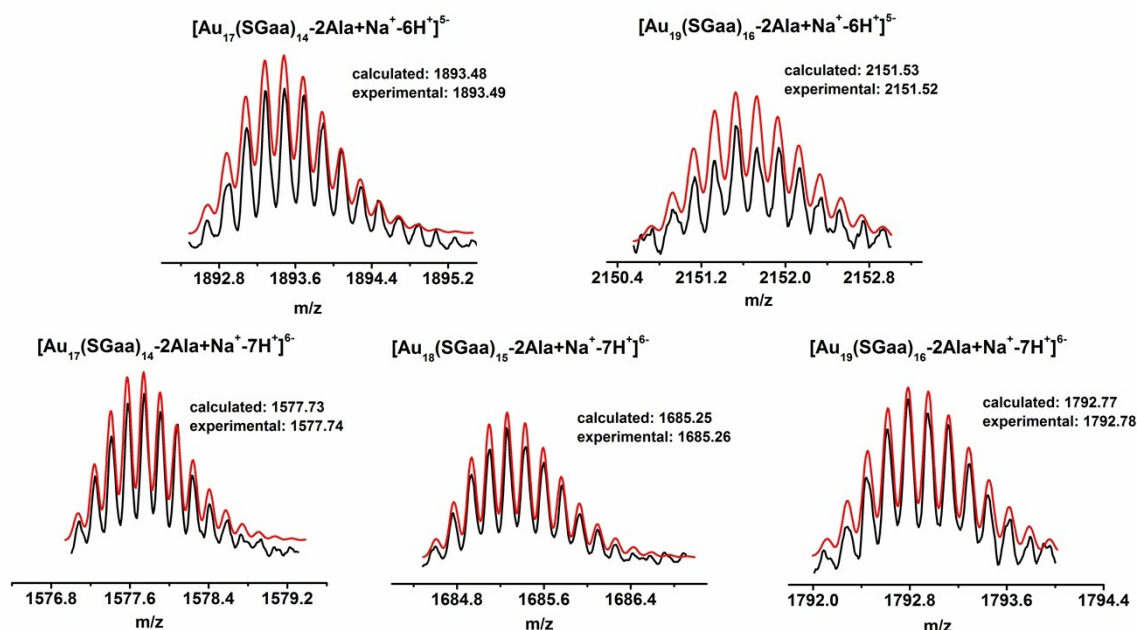

**Fig. S1.** Experimental (black line) and simulated (red line) isotope patterns of the other five peaks below  $m/z$  2400.

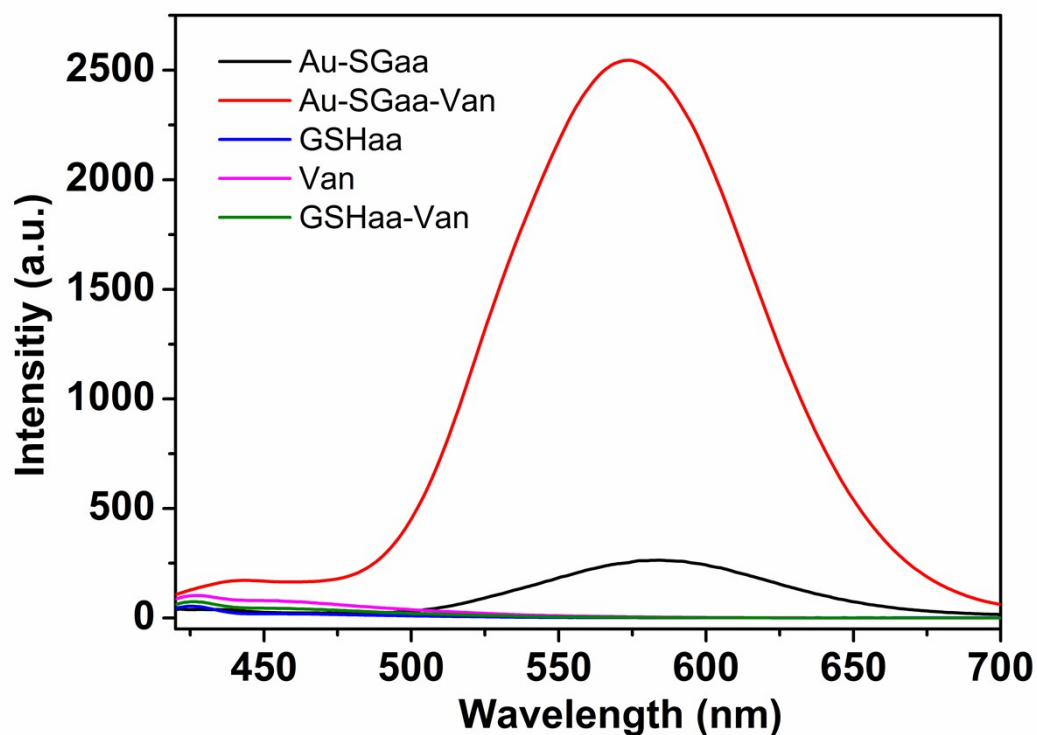

**Fig. S2.** Fluorescence spectra of Au-SGaa, Au-SGaa-Van, GSHaa, Van, mixture of GSHaa and Van ( $\lambda_{\text{ex}}=380$  nm).

**Table S1.** Fluorescent lifetime of Au-SGaa and Au-SGaa-Van

|                    | $\tau_1$     | $\tau_2$      | $\tau_3$       | $\tau_{\text{average}}$ |
|--------------------|--------------|---------------|----------------|-------------------------|
| <b>Au-SGaa</b>     | 32 ns (0.09) | 234 ns (0.23) | 1854 ns (0.68) | 1317 ns                 |
| <b>Au-SGaa-Van</b> | 44 ns (0.05) | 277 ns (0.20) | 2417 ns (0.75) | 1870 ns                 |

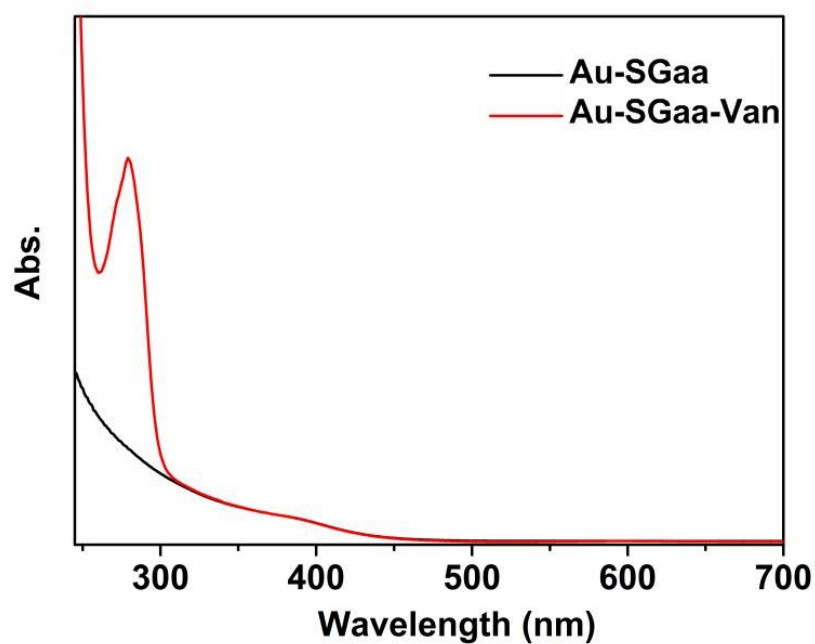

**Fig. S3.** UV-vis spectra of Au-SGaa and Au-SGaa-Van

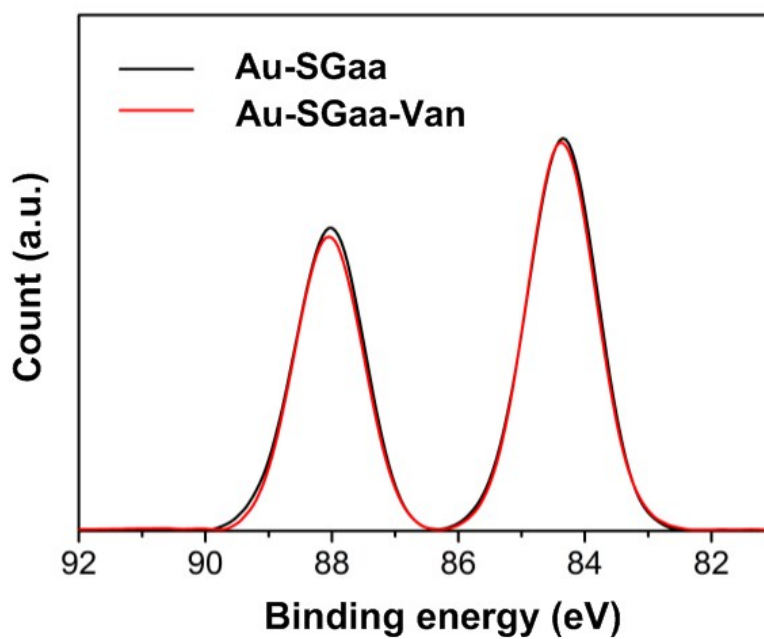

**Fig. S4.** XPS survey spectrum of the Au-SGaa and Au-SGaa-Van. The slight shift of the binding energy ( $\sim 0.05$  eV) of Au-SGaa-Van compared to Au-SGaa was in the range of the systematic error of the equipment.

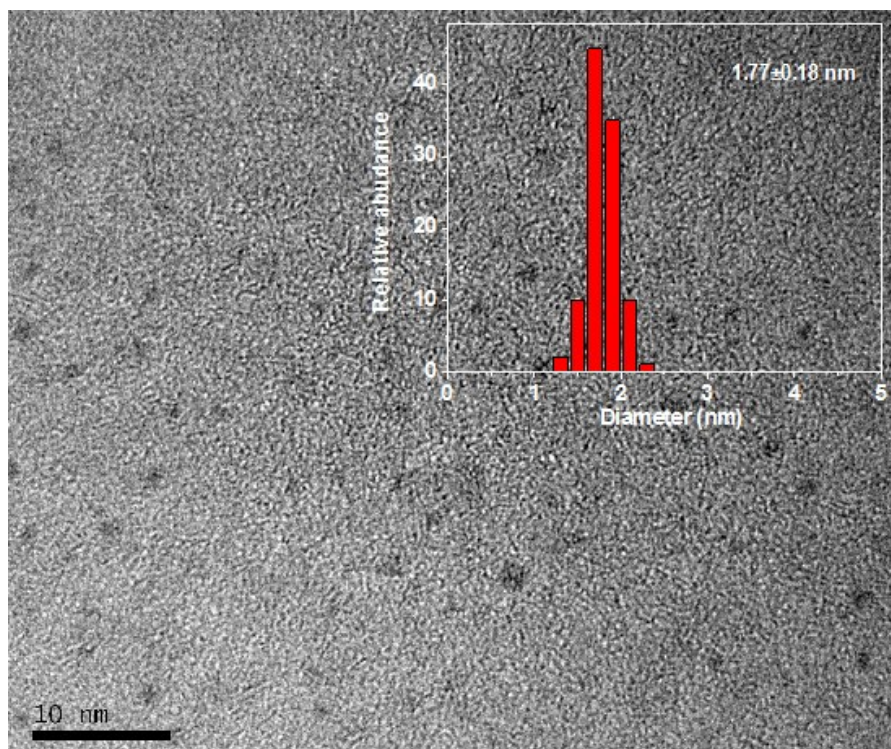

**Fig. S5.** TEM image of Au-SGaa-Van. Inset shows the histograms of core sizes.

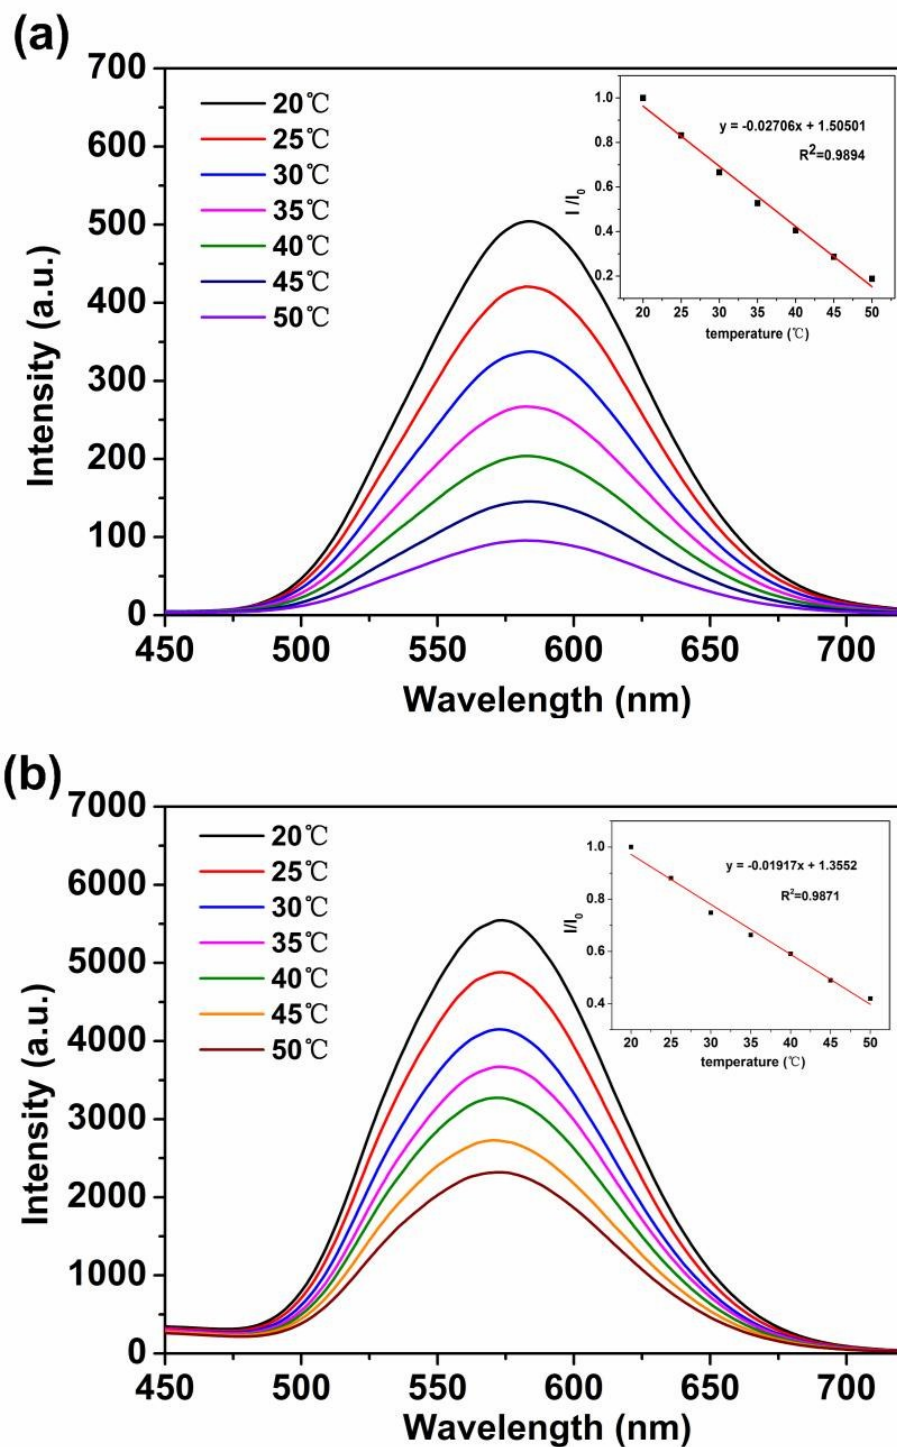

**Fig. S6.** Fluorescence spectra of Au-SGaa (a) and Au-SGaa-Van (b) at different temperature (from 20 to 50 °C). Insets show the corresponding fluorescence intensity at  $\lambda_{\text{max}}$  (580 nm for Au-SGaa and 570 nm for Au-SGaa-Van) vs temperature in range of 20-50 °C.

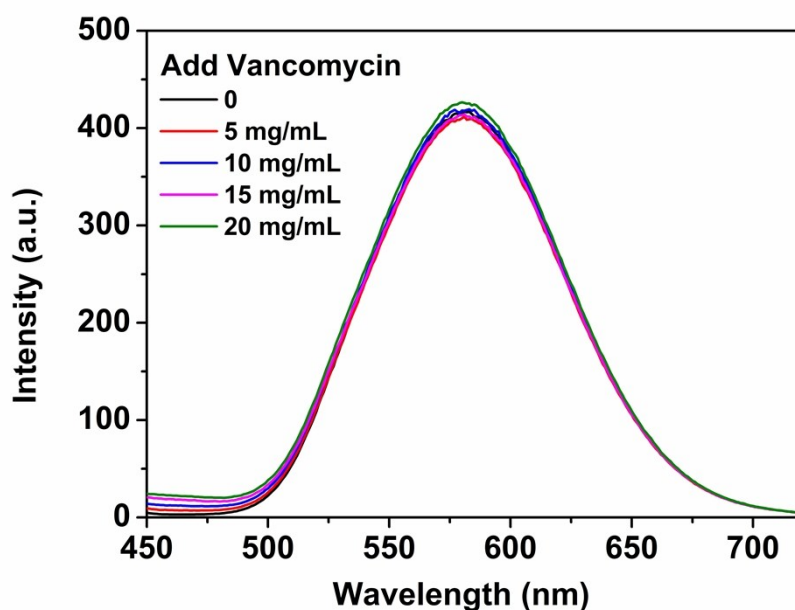

**Fig. S7.** Fluorescence spectra of GSH-protected Au NCs with the addition of 0, 5, 10, 15, 20 mg/mL Van. ( $\lambda_{\text{ex}} = 380 \text{ nm}$ )

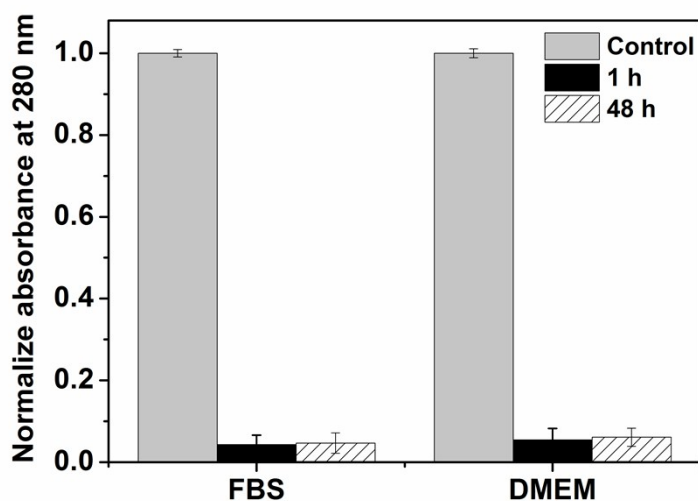

**Fig. S8.** Comparison of the amount of free Van ( $10 \text{ mg mL}^{-1}$ ) in the 10% FBS and DMEM with or without Au-SGaa. The control groups are Van in 10% FBS and DMEM for 48 h. The other groups are Au-SGaa-Van in 10% FBS and DMEM for 1 h and 48 h. The sample were centrifuged in an ultrafilter with a molecular weight cut-off (MWCO) of 3 kDa and the absorbances of filtered solution at 280 nm were recorded.



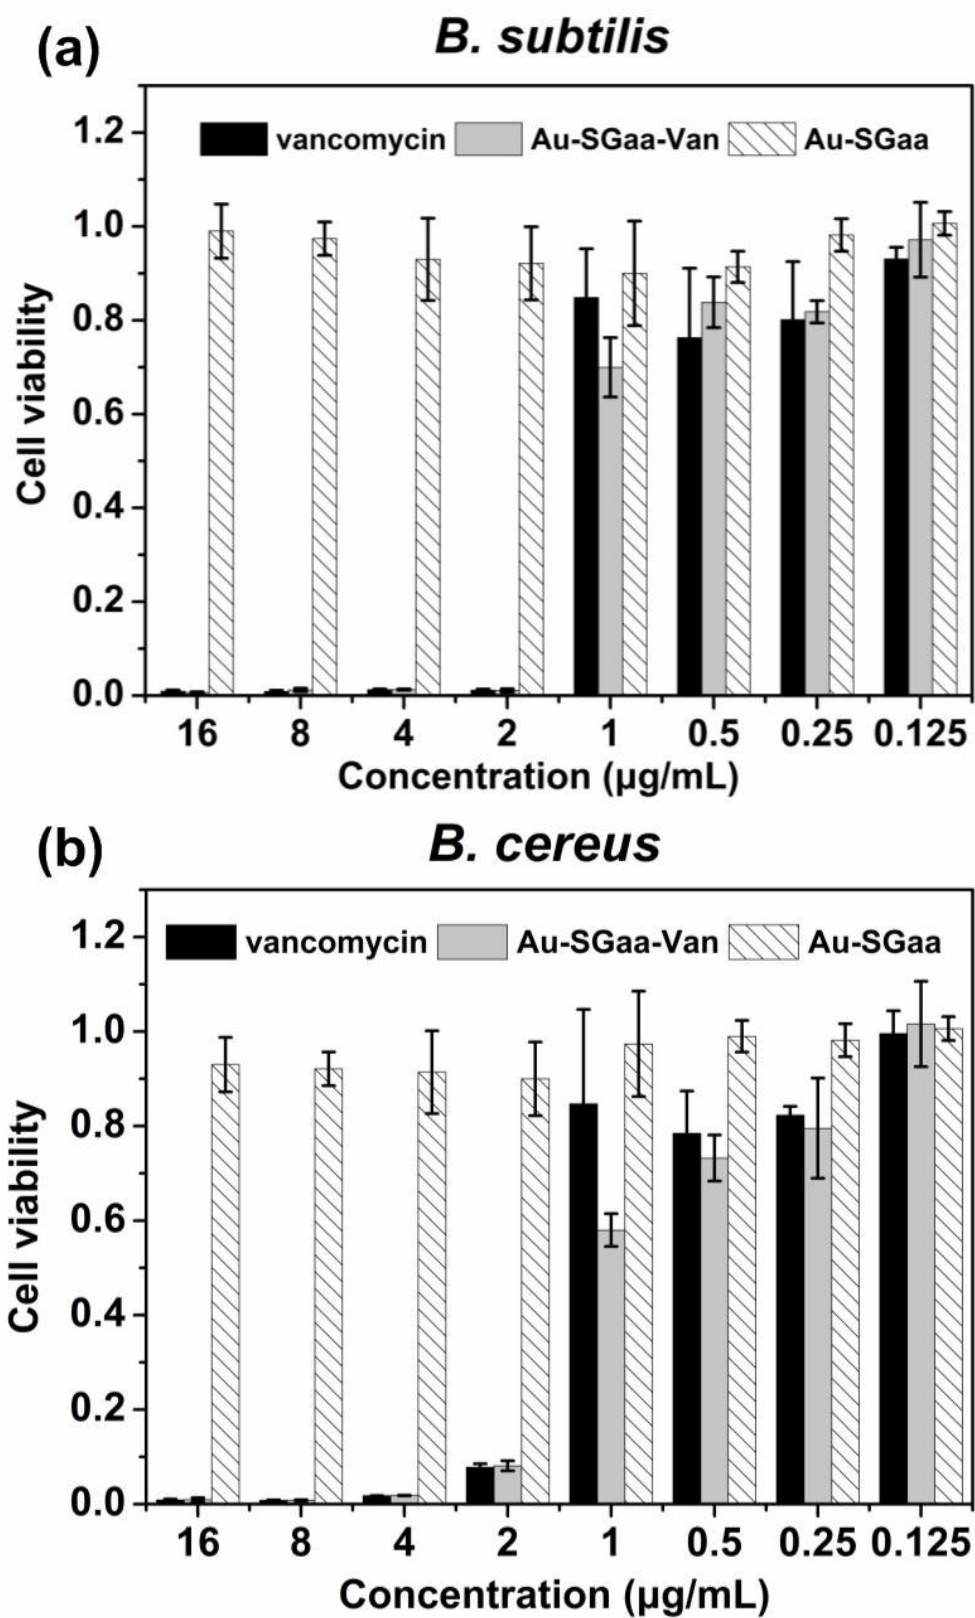

**Fig. S9.** Antibacterial activity of Au-SGaa-Van compared with Van and Au-SGaa against *B. Subtilis* (a) and *B. cereus* (b). Data are means  $\pm$  standard deviation with  $n = 3$ .

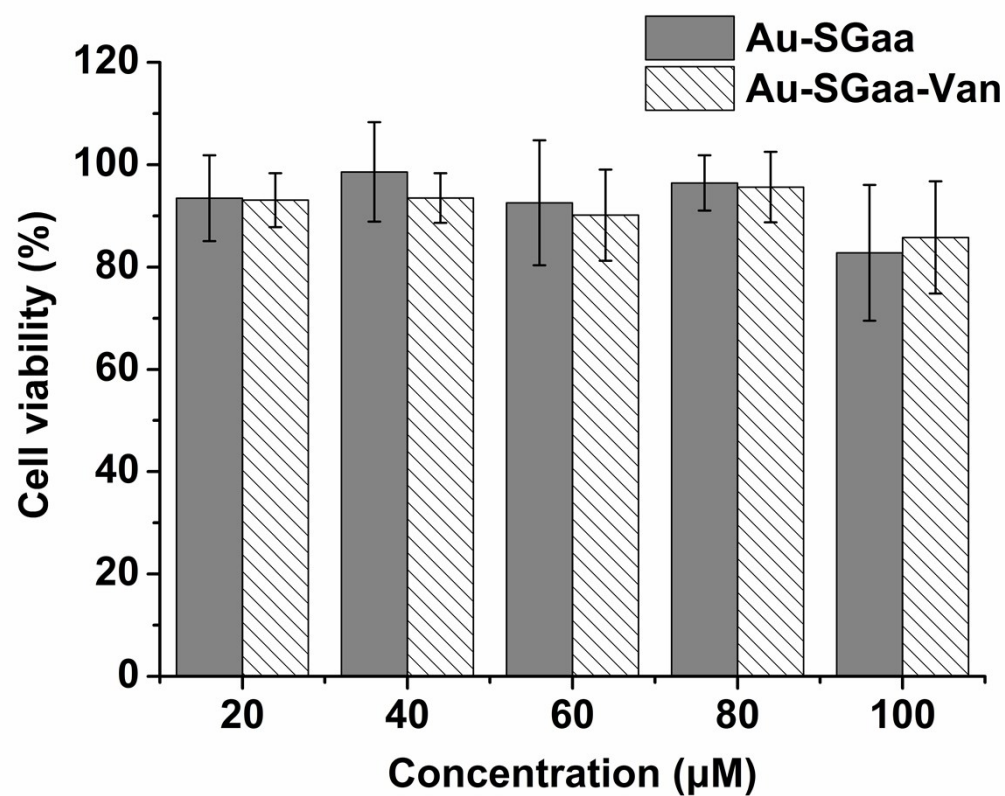

**Fig. S10.** The percentage viability of MCF-7 exposed to different concentrations of Au-SGaa and Au-SGaa-Van resulted from the MTT assays. The data are displayed as means  $\pm$  standard deviation with  $n = 3$ .
